# Supplementary material
Source: PubMed Central journal article supplement (PMC1435812)
Supplement: plntphys_pp.105.074922_1.pdf [file plntphys_pp.105.074922_1.pdf]

Supplemental information to

**Huang J, and *et al.*** LIANK, Characterized as a Ubiquitin Ligase, Is Closely Associated with Membrane-enclosed Organelles and Required for Pollen Germination and Pollen Tube Growth in *Lilium longiflorum*.

---

| Accessions | BLAST Results                                              |
|------------|------------------------------------------------------------|
| DN985072   | novel, or F-box family protein                             |
| DN985073   | LLP-B3 protein, or major allergen-like, or LAT52 precursor |
| DN985074   | LLP-B3 protein, or major allergen-like, or LAT52 precursor |
| DN985075   | ribosomal protein                                          |
| DN985076   | novel                                                      |
| DN985077   | novel                                                      |
| DN985078   | novel                                                      |
| DN985079   | novel                                                      |
| DN985080   | Myb-related transcription factor                           |
| DN985081   | novel                                                      |
| DN985082   | novel                                                      |
| DN985083   | novel                                                      |
| DN985084   | B12D-like protein                                          |
| DN985085   | long-chain acyl-CoA synthetase                             |
| DN985086   | novel                                                      |
| DN985087   | pollen preferential protein                                |
| DN985088   | novel                                                      |
| DN985089   | cytochrome b5                                              |
| DN985090   | novel                                                      |
| DN985091   | novel                                                      |
| DN985092   | novel                                                      |
| DN985093   | pyruvate kinase                                            |
| DN985094   | Ras- Rab-like GTP-binding protein                          |
| DN985095   | novel, or transmembrane protein                            |
| DN985096   | novel                                                      |
| DN985097   | putative ATP synthase, or chaperone                        |
| DN985098   | novel                                                      |
| DN985099   | cathepsin B-like cysteine protease                         |
| DN985100   | glutaredoxin-like protein                                  |
| DN985101   | novel                                                      |
| DN985102   | novel                                                      |
| DN985103   | pectin methylesterase                                      |
| DN985104   | putative pentatricopeptide repeat protein                  |
| DN985105   | novel                                                      |

---

---

|          |                                                                 |
|----------|-----------------------------------------------------------------|
| DN985106 | novel                                                           |
| DN985107 | novel                                                           |
| DN985108 | fatty acid desaturase                                           |
| DN985109 | sugar transporter                                               |
| DN985110 | novel                                                           |
| DN985111 | cathepsin B-like cysteine protease                              |
| DN985112 | novel                                                           |
| DN985113 | putative protein kinase                                         |
| DN985114 | actin                                                           |
| DN985115 | putative synbindin, or trafficking protein                      |
| DN985116 | polyA binding protein                                           |
| DN985117 | putative zinc-finger protein                                    |
| DN985118 | type I membrane protein                                         |
| DN985119 | nodulin-like or nodulin-related                                 |
| DN985120 | ankyrin-like protein (LIANK)                                    |
| DN985121 | Rab GTPase                                                      |
| DN985122 | cytochrome C oxidase, or novel                                  |
| DN985123 | sperm-related, or novel                                         |
| DN985124 | germine-like, oxalate oxidase, putative                         |
| DN985125 | GDSL-motif lipase, anther-specific proline-rich protein         |
| DN985126 | GDSL-motif lipase, anther-specific proline-rich protein         |
| DN985127 | cystathionine gamma-synthase                                    |
| DN985128 | serine threonine kinase                                         |
| DN985129 | leaf senescence protein-like, or novel                          |
| DN985130 | subtilisin-like protease, serine protease, P69C protein         |
| DN985131 | novel                                                           |
| DN985132 | 2-Cys peroxiredoxin, thioredoxin peroxiredoxin                  |
| DN985133 | novel                                                           |
| DN985134 | ribosomal protein S27                                           |
| DN985135 | ubiquitin-conjugation enzyme                                    |
| DN985136 | glycerophosphodiesterase-like, GPI-anchored protein             |
| DN985137 | auxin efflux carrier protein                                    |
| DN985138 | novel                                                           |
| DN985139 | novel                                                           |
| DN985140 | novel                                                           |
| DN985141 | novel                                                           |
| DN985142 | SET-domain containing protein, trithorax 1, Zinc finger protein |
| DN985143 | pectin esterase inhibitor                                       |
| DN985144 | importin beta                                                   |
| DN985145 | novel                                                           |
| DN985146 | neural adhesion molecule, or novel                              |

---

---

|          |                                                                      |
|----------|----------------------------------------------------------------------|
| DN985147 | F-box family protein                                                 |
| DN985148 | proline-rich protein precursor, cleavage simulation factor, or novel |
| DN985149 | pectin esterase inhibitor                                            |
| DN985150 | novel                                                                |
| DN985151 | NADH-cytochrome b5 reductase                                         |
| DN985152 | human GTPase regulator, myosin heavy chain, or novel                 |
| DN985153 | LEA III protein isoform, pollen coat protein                         |
| DN985154 | novel                                                                |
| DN985155 | novel                                                                |
| DN985156 | MADS box transcription factor                                        |
| DN985157 | kinase, leucine-rich repeat                                          |
| DN985158 | novel                                                                |
| DN985159 | seed maturation protein                                              |
| DN985160 | SNAP-25 like protein                                                 |
| DN985161 | novel                                                                |
| DN985162 | novel                                                                |
| DN985163 | proteasome subunit 4 like                                            |
| DN985164 | novel                                                                |
| DN985165 | ATPase, ATP synthase beta subunit                                    |
| DN985166 | novel                                                                |
| DN985167 | ADP ribosylation factor                                              |
| DN985168 | novel                                                                |
| DN985169 | novel                                                                |
| DN985170 | novel                                                                |
| DN985171 | novel                                                                |

---

**Supplemental Table I.** BLAST results of 100 sequenced cDNAs that exhibited highest germinated/ ungerminated ratios in cDNA microarray.
